# Supplementary material for: Exploration of the Genetic Diversity of Solina Wheat and Its Implication for Grain Quality
Source: Plants (Basel). 2022 Apr 26;11(9):1170. doi: 10.3390/plants11091170 (PMC9102871; doi:10.3390/plants11091170)
Supplement: Supplementary file 1 [file plants-11-01170-s001.zip]

Archive with 5 entries (5 files):
- Figure S1 ver2.pdf
- Figure S2 ver2.pdf
- Figure S3 ver2.pdf
- Table S1.pdf
- Table S2.pdf
