# Supplementary material for: Exploration of the Genetic Diversity of Solina Wheat and Its Implication for Grain Quality
Source: Plants (Basel). 2022 Apr 26;11(9):1170. doi: 10.3390/plants11091170 (PMC9102871; doi:10.3390/plants11091170)
Supplement: Supplementary file 1 [file plants-11-01170-s001.zip › Table S1.pdf]

**Table S1** Geographical location of 24 Solina accessions collected in 2018 in Abruzzo region

| N.ID | Location              | Latitude | Longitude | Altitude<br>(m a.s.l.) |
|------|-----------------------|----------|-----------|------------------------|
| 1    | Castelvecchio Subequo | 42.13    | 13.73     | 492                    |
| 2    | Castelvecchio Subequo | 42.13    | 13.73     | 492                    |
| 3    | Introdacqua           | 42.01    | 13.90     | 652                    |
| 4    | Scanno                | 41.90    | 13.88     | 1,004                  |
| 5    | Luco dei Marsi        | 41.96    | 13.47     | 664                    |
| 6    | Goriano Sicoli        | 42.08    | 13.77     | 712                    |
| 7    | Tagliacozzo           | 42.07    | 13.25     | 736                    |
| 8    | Rosciolo dei Marsi    | 42.12    | 13.34     | 902                    |
| 9    | Magliano dei Marsi    | 42.08    | 13.36     | 707                    |
| 10   | Magliano dei Marsi    | 42.08    | 13.36     | 707                    |
| 11   | Scurcola Marsicana    | 42.06    | 13.34     | 698                    |
| 12   | Rocca Pia             | 41.93    | 13.98     | 1,067                  |
| 13   | Scurcola Marsicana    | 42.06    | 13.34     | 698                    |
| 14   | Pescosansonesco       | 42.25    | 13.88     | 532                    |
| 15   | Farindola             | 42.44    | 13.82     | 514                    |
| 16   | Cagnano Amiterno      | 42.46    | 13.23     | 844                    |
| 17   | Castel Del Monte      | 42.37    | 13.73     | 1,354                  |
| 18   | Montereale            | 42.53    | 13.24     | 911                    |
| 19   | Capestrano            | 42.27    | 13.77     | 501                    |
| 20   | Barisciano            | 42.33    | 13.59     | 948                    |
| 21   | Capitignano           | 42.52    | 13.30     | 908                    |
| 22   | Ofena                 | 42.33    | 13.76     | 521                    |
| 23   | Rivisondoli           | 41.87    | 14.07     | 1,309                  |
| 24   | Elice                 | 42.52    | 13.97     | 249                    |
