# Supplementary material for: Exploration of the Genetic Diversity of Solina Wheat and Its Implication for Grain Quality
Source: Plants (Basel). 2022 Apr 26;11(9):1170. doi: 10.3390/plants11091170 (PMC9102871; doi:10.3390/plants11091170)
Supplement: Supplementary file 1 [file plants-11-01170-s001.zip › Table S2.pdf]

**Table S2** Numbers of SNP markers detected and filtered in the three datasets, also ordered per genome and chromosome.

|                | Bulk dataset | Single Seed dataset | CIMMYT/Solina dataset |
|----------------|--------------|---------------------|-----------------------|
| 1A             | 994          | 746                 | 262                   |
| 1B             | 1,003        | 657                 | 195                   |
| 1D             | 580          | 441                 | 89                    |
| 2A             | 1,067        | 728                 | 229                   |
| 2B             | 1,368        | 1,004               | 271                   |
| 2D             | 844          | 610                 | 108                   |
| 3A             | 970          | 703                 | 216                   |
| 3B             | 1,108        | 727                 | 245                   |
| 3D             | 575          | 423                 | 47                    |
| 4A             | 935          | 659                 | 150                   |
| 4B             | 527          | 413                 | 124                   |
| 4D             | 259          | 174                 | 25                    |
| 5A             | 951          | 687                 | 270                   |
| 5B             | 1,217        | 912                 | 270                   |
| 5D             | 558          | 387                 | 62                    |
| 6A             | 1,018        | 676                 | 166                   |
| 6B             | 1,331        | 868                 | 241                   |
| 6D             | 669          | 462                 | 61                    |
| 7A             | 1,450        | 931                 | 280                   |
| 7B             | 1,096        | 698                 | 175                   |
| 7D             | 792          | 558                 | 75                    |
| Genome A       | 7,385        | 5,130               | 1,573                 |
| Genome B       | 7,650        | 5,279               | 1,521                 |
| Genome D       | 4,277        | 3,055               | 467                   |
| Total filtered | 23,741       | 15,959              | 3,842                 |
